# Supplementary material
Source: Springer Nature journal article supplement (https://www.springermedizin.de/resource/supplementary/13032_2014_85_MOESM3_ESM.pdf/9651592)

# IL1 $\beta$

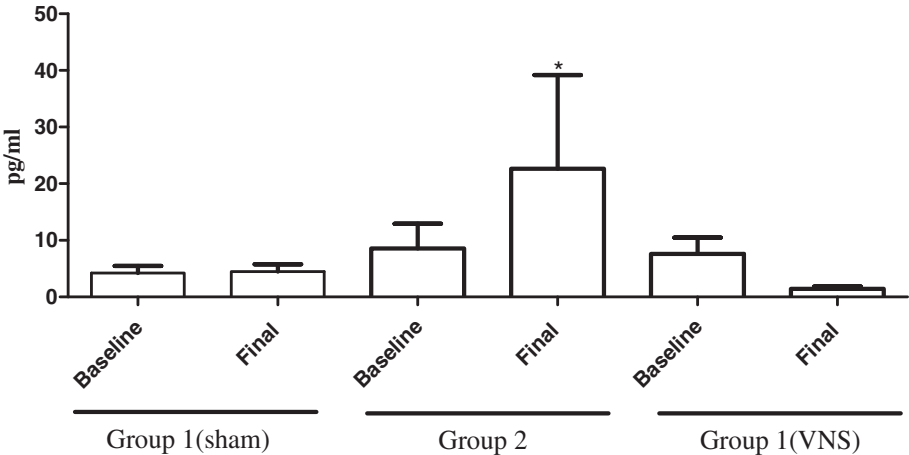

Supplement: MOESM3 [file 9651592]
